# Supplementary material for: Behavior Change Techniques in Physical Activity eHealth Interventions for People With Cardiovascular Disease: Systematic Review
Source: PubMed Central journal article supplement (PMC5559649; doi:10.2196/jmir.7782), 2017-08-02
Supplement: jmir_v19i8e281_app1.pdf [file jmir_v19i8e281_app1.pdf]

## Multimedia Appendix 1 – Keyword Searches

**Title:** Systematic review of the use of behaviour change techniques (BCT's) in eHealth interventions for adults with cardiovascular disease.

**Databases:**

**Limited to Published date:** 2000-2016

**Searched:** 10.02.16

Ebscohost - MEDLINE, PsycINFO, Academic Search Complete, SPORTDiscus with Full Text, CINAHL Complete

| Search No. | Search Terms                                                                                                                                                                                                                                                                                                                                                                                                                                                                                                                                                                                                                                       | Results   |
|------------|----------------------------------------------------------------------------------------------------------------------------------------------------------------------------------------------------------------------------------------------------------------------------------------------------------------------------------------------------------------------------------------------------------------------------------------------------------------------------------------------------------------------------------------------------------------------------------------------------------------------------------------------------|-----------|
| S5         | S1 AND S2 AND S3 AND S4                                                                                                                                                                                                                                                                                                                                                                                                                                                                                                                                                                                                                            | 649       |
| S4         | TI ( "physical activity" or "activity level" or "sedentary behaviour" or "sedentary behavior" or exercise or walking or running or recreation or "fun and games" or sport or pastime ) OR AB ( "physical activity" or "activity level" or "sedentary behaviour" or "sedentary behavior" or exercise or walking or running or recreation or "fun and games" or sport or pastime)                                                                                                                                                                                                                                                                    | 1,034,549 |
| S3         | TI ( intervention or education or information or train or coach or skills or program* or counsel or mentor or support or "health promotion" or lifestyle or advocacy or communicate or empower or therapy or intensive or manage or psycho* or treat or rehabilitation or "disease management" or "disease treatment" ) OR AB ( intervention or education or information or train or coach or skills or program* or counsel or mentor or support or "health promotion" or lifestyle or advocacy or communicate or empower or therapy or intensive or manage or psycho* or treat or rehabilitation or "disease management" or "disease treatment" ) | 9,732,085 |
| S2         | TI ( "coronary heart disease" or chd or "coronary artery disease" or cvd or cardiovascular ) OR AB ( "coronary heart disease" or chd or "coronary artery disease" or cvd or cardiovascular )                                                                                                                                                                                                                                                                                                                                                                                                                                                       | 552,613   |
| S1         | TI ("mobile phone" or "cell phone" or "cellular phone" or smartphone or "smart phone" or "mobile technology" or telemedicine or mHealth or eHealth or wireless or "personal digital assistant" or computer or technology or digital) OR AB ("mobile phone" or "cell phone" or "cellular phone" or smartphone or "smart phone" or "mobile technology" or telemedicine or mHealth or eHealth or wireless or "personal digital assistant" or computer or technology or digital)                                                                                                                                                                       | 1,516,069 |

Scopus

| Search No. | Search Terms                                                                                                                                                                                                                                                                                                                   | Results   |
|------------|--------------------------------------------------------------------------------------------------------------------------------------------------------------------------------------------------------------------------------------------------------------------------------------------------------------------------------|-----------|
| S5         | S1 AND S2 AND S3 AND S4                                                                                                                                                                                                                                                                                                        | 85        |
| S4         | TITLE-ABS( "physical activity" or "activity level" of "sedentary behaviour" or "sedentary behavior" or exercise or walking or running or recreation or "fun and games" or sport or pastime)                                                                                                                                    | 28,263    |
| S3         | TITLE-ABS ( intervention or education or information or train or coach or skills or program* or counsel or mentor or support or "health promotion" or lifestyle or advocacy or communicate or empower or therapy or intensive or manage or psycho* or treat or rehabilitation or "disease management" or "disease treatment" ) | 7,172,380 |
| S2         | TITLE-ABS ( "coronary heart disease" or chd or "coronary artery disease" or cvd or cardiovascular )                                                                                                                                                                                                                            | 371,781   |
| S1         | TITLE-ABS ("mobile phone" or "cell phone" or "cellular phone" or smartphone or "smart phone" or "mobile technology" or telemedicine or mHealth or eHealth or wireless or "personal digital assistant" or computer or technology or digital)                                                                                    | 2,481,098 |

Web of Science (Core Collection)

| Search No. | Search Terms                                                                                                                                                                                                                                                                                                            | Results   |
|------------|-------------------------------------------------------------------------------------------------------------------------------------------------------------------------------------------------------------------------------------------------------------------------------------------------------------------------|-----------|
| S5         | S1 AND S2 AND S3 AND S4                                                                                                                                                                                                                                                                                                 | 784       |
| S4         | TS=("physical activity" or "activity level" or "sedentary behaviour" or "sedentary behavior" or exercise or walking or running or recreation or "fun and games" or sport or pastime)                                                                                                                                    | 710,150   |
| S3         | TS=( intervention or education or information or train or coach or skills or program* or counsel or mentor or support or "health promotion" or lifestyle or advocacy or communicate or empower or therapy or intensive or manage or psycho* or treat or rehabilitation or "disease management" or "disease treatment" ) | 6,878,918 |
| S2         | TS=( "coronary heart disease" or chd or "coronary artery disease" or cvd or cardiovascular )                                                                                                                                                                                                                            | 422,096   |
| S1         | TS=("mobile phone" or "cell phone" or "cellular phone" or smartphone or "smart phone" or "mobile technology" or telemedicine or mHealth or eHealth or wireless or "personal digital assistant" or computer or technology or digital)                                                                                    | 1,668,653 |

**Note:** TS= Title, Abstract, Author Keywords and Keywords Plus<sup>o</sup>
