# Supplementary material for: Behavior Change Techniques in Physical Activity eHealth Interventions for People With Cardiovascular Disease: Systematic Review
Source: PubMed Central journal article supplement (PMC5559649; doi:10.2196/jmir.7782), 2017-08-02
Supplement: jmir_v19i8e281_app4.pdf [file jmir_v19i8e281_app4.pdf]

Multimedia Appendix 4: Frequency of BCTs used in the included studies

| BCT label                                              | BCT group               | Example of how the BCT was used                                                                                                                                                                                                                                                        | Frequency of use (%) | Studies where found              |
|--------------------------------------------------------|-------------------------|----------------------------------------------------------------------------------------------------------------------------------------------------------------------------------------------------------------------------------------------------------------------------------------|----------------------|----------------------------------|
| <b>5.1 Information about health consequences</b>       | Natural consequences    | <i>"...The website contained a glossary and information resources about CHD, diet, exercise and smoking..."<sup>16</sup></i>                                                                                                                                                           | 18 (78%)             | 1-4, 6, 8, 10-11, 13-18, 20-23   |
| <b>1.1 Goal setting (behaviour)</b>                    | Goals and planning      | <i>"...Together with a MyCor physician, individuals goal for blood pressure, footsteps and weight were defined..."<sup>2</sup></i>                                                                                                                                                     | 17 (74%)             | 1-4, 8-15, 17-20, 22             |
| <b>2.3 Self-monitoring of behaviour</b>                | Feedback and monitoring | <i>"...Following hospital discharge, participants were asked to log their daily activity on the CardioFit website..."<sup>19</sup></i>                                                                                                                                                 | 11 (48%)             | 2, 4, 7-8, 10, 12, 17, 19, 21-23 |
| <b>3.2 Social support (practical)</b>                  | Social support          | <i>"...All participants received detailed programme information and 1h of face-to-face training on technology use..."<sup>22</sup></i>                                                                                                                                                 | 11 (48%)             | 1-2, 6, 11, 14, 16-17, 19, 21-23 |
| <b>4.1 Instruction on how to perform the behaviour</b> | Shaping knowledge       | <i>"...Tutorials were organised to engage self-control processes including exercise planning, goal-setting, monitoring and self-regulation, and relapse prevention..."<sup>19</sup></i>                                                                                                | 10 (43%)             | 3, 8-9, 11, 13-14, 18-21         |
| <b>2.2 Feedback on behaviour</b>                       | Feedback and monitoring | <i>"... patients were provided an individual, automatic feedback report that was sent to their smartphone once weekly..."<sup>2</sup></i>                                                                                                                                              | 10 (43%)             | 1-3, 8, 10-12, 19, 22-23         |
| <b>2.6 Biofeedback</b>                                 | Feedback and monitoring | <i>"...In general, these patients were monitored electrocardiographically for their first 4 to 6 sessions with exercise intensity guided by a progressive heart rate prescription of 65% to 85% of their maximal measured heart rate from the baseline stress test..."<sup>1</sup></i> | 9 (39%)              | 1, 2, 4, 7, 12, 14-15, 18, 22    |
| <b>3.1 Social support (unspecified)</b>                | Social support          | <i>"...Social reinforcement network that encourages the adoption and maintenance of a healthier lifestyle for improved wellness..."<sup>23</sup></i>                                                                                                                                   | 9 (39%)              | 3, 8, 12, 16, 19-23              |
| <b>9.1 Credible source</b>                             | Comparison of outcomes  | <i>"...Role model video vignettes..."<sup>17</sup></i>                                                                                                                                                                                                                                 | 8 (35%)              | 1, 4, 6, 8, 13, 17, 20-21        |
| <b>2.4 Self-monitoring of outcomes of</b>              | Feedback and monitoring | <i>"...Each participant was equipped with a smartphone preinstalled with health diary and activity monitoring</i>                                                                                                                                                                      | 7 (30%)              | 2, 4, 15, 18, 21-23              |

|                                                                 |                             |                                                                                                                                                                                                                                               |              |                       |
|-----------------------------------------------------------------|-----------------------------|-----------------------------------------------------------------------------------------------------------------------------------------------------------------------------------------------------------------------------------------------|--------------|-----------------------|
| <b>behaviour</b>                                                |                             | <i>applications; blood pressure monitor and weight scale...</i> <sup>22</sup>                                                                                                                                                                 |              |                       |
| <b>1.4 Action planning</b>                                      | Goals and planning          | <i>"...The home programme consisted of regular exercise prescription..."</i> <sup>17</sup>                                                                                                                                                    | 7 (30%)      | 1, 3-4, 9, 14, 17, 20 |
| <b>8.7 Graded tasks</b>                                         | Repetition and substitution | <i>"...Exercise intensity was 40% weeks 2 to 4, 50% weeks 5 to 6, 60% weeks 7 to 8, 70% weeks 9 to 10, and 80% weeks 11 to 12..."</i> <sup>15</sup>                                                                                           | 6 (26%)      | 5, 8, 10-11, 15, 23   |
| <b>2.7 Feedback on outcome(s) of behaviour</b>                  | Feedback and monitoring     | <i>"...If patients confirmed these values, messages to consult their physician appeared, as these changes in weight, blood pressure, or lab values could represent a potential danger to their health..."</i> <sup>23</sup>                   | 5 (22%)      | 2, 4, 21-23           |
| <b>2.5 Monitoring of outcomes of behaviour without feedback</b> | Feedback and monitoring     | <i>"...Participants were asked to wear their heart rate monitors when exercising and upload their exercise data at least twice per week to the vCRP..."</i> <sup>14</sup>                                                                     | 5 (22%)      | 3, 5, 7-8, 24         |
| <b>1.2 Problem solving</b>                                      | Goals and planning          | <i>"...Participants were asked to develop strategies to overcome barriers to increasing their physical activity..."</i> <sup>12</sup>                                                                                                         | 4 (17%)      | 2, 6, 13, 23          |
| <b>11.2 Reduce negative emotions</b>                            | Regulation                  | <i>"...Emotional support was provided on an as needed basis via email..."</i> <sup>21</sup>                                                                                                                                                   | 4 (17%)      | 12-13, 16-17          |
| <b>7.1 Prompts/cues</b>                                         | Associations                | <i>"... Have you gone for your walk today jane?..."</i> <sup>6</sup> (message)                                                                                                                                                                | 3<br>(13.0%) | 6, 8, 10              |
| <b>1.5 Review behaviour goals</b>                               | Goals and planning          | <i>"...Baseline and post-programme appointments between the registered dietician and patients at the telemedicine-supported site were conducted by telemedicine..."</i> <sup>9</sup>                                                          | 3 (13%)      | 3, 16, 23             |
| <b>1.3 Goal setting (outcome)</b>                               | Goals and planning          | <i>"...The PHA provides user-friendly and interactive access to... targets, plans..."</i> <sup>23</sup>                                                                                                                                       | 3 (13%)      | 4-5, 7                |
| <b>2.1 Monitoring of behaviour by others without feedback</b>   | Feedback and monitoring     | <i>"...In addition, video-recorders (cassette or DVD) for physiotherapy and 1-lead ECG devices were provided. An electronic health record was prepared for each patients and the patients general practitioner informed..."</i> <sup>20</sup> | 2 (9%)       | 7, 19                 |

|                                                    |                         |                                                                                                                                                                                            |        |        |
|----------------------------------------------------|-------------------------|--------------------------------------------------------------------------------------------------------------------------------------------------------------------------------------------|--------|--------|
| <b>3.3 Social support (emotional)</b>              | Social support          | <i>"...Providing alternative coping strategies when the patient appeared to use inappropriate strategies..."<sup>13</sup></i>                                                              | 2 (9%) | 17, 20 |
| <b>10.3 Non-specific reward</b>                    | Reward and threat       | <i>"...The PHA provides user-friendly and interactive access to... awards that encourages the adoption and maintenance of a healthier lifestyle for improved wellness..."<sup>23</sup></i> | 1 (4%) | 4      |
| <b>12.1 Restructuring the physical environment</b> | Antecedents             | <i>"...The virtual terrain in our study consisted of a 5-km-long straight (or curved) stretch of road, grass and trees with a mountain background..."<sup>7</sup></i>                      | 1 (4%) | 5      |
| <b>12.5 Adding objects to the environment</b>      | Antecedents             | <i>"...The images were projected from behind the viewer through 3 projectors connected with computers..."<sup>7</sup></i>                                                                  | 1 (4%) | 5      |
| <b>11.1 Pharmacological support</b>                | Regulation              | <i>"...The smoking cessation tele-coaching program included nicotine replacement therapy..."<sup>11</sup></i>                                                                              | 1 (4%) | 10     |
| <b>6.1 Demonstration of the behaviour</b>          | Comparison of behaviour | <i>"Video role model messages"<sup>8</sup></i>                                                                                                                                             | 1 (4%) | 13     |
| <b>6.2 Social comparison</b>                       | Comparison of behaviour | <i>"Video role model messages"<sup>8</sup></i>                                                                                                                                             | 1 (4%) | 13     |
| <b>1.7 Review outcome goals</b>                    | Goals and planning      | <i>"...You're a few weeks into the program. Well done! Time to add a new goal - maybe you are ready to think about a long-term goal this time..."<sup>8</sup> (message)</i>                | 1 (4%) | 13     |
| <b>10.4 Social reward</b>                          | Reward and threat       | <i>Paper listed the behaviour change techniques used in the intervention. Social reward was one of the BCT's used.</i>                                                                     | 1 (4%) | 16     |
| <b>1.8 Behavioural contract</b>                    | Goals and planning      | <i>"...Provided patients with written information that included the name, frequency and action of their medications..."<sup>4</sup></i>                                                    | 1 (4%) | 22     |
