# Supplementary material for: Behavior Change Techniques in Physical Activity eHealth Interventions for People With Cardiovascular Disease: Systematic Review
Source: PubMed Central journal article supplement (PMC5559649; doi:10.2196/jmir.7782), 2017-08-02
Supplement: jmir_v19i8e281_app5.pdf [file jmir_v19i8e281_app5.pdf]

Multimedia Appendix 5: Link between Interventions and Behaviour Change Techniques

Self-report studies with no difference between experimental and control groups

| Behaviour Change Technique Codes |     |     |     |     |     |     |     |     |     |     |     |     |     |     |     |     |     |     |     |     |     |     |     |     |     |      |      |      |      |      |      |
|----------------------------------|-----|-----|-----|-----|-----|-----|-----|-----|-----|-----|-----|-----|-----|-----|-----|-----|-----|-----|-----|-----|-----|-----|-----|-----|-----|------|------|------|------|------|------|
| Study                            | 1.1 | 1.2 | 1.3 | 1.4 | 1.5 | 1.6 | 1.7 | 1.8 | 2.1 | 2.2 | 2.3 | 2.4 | 2.5 | 2.6 | 2.7 | 3.1 | 3.2 | 3.3 | 4.1 | 5.1 | 6.1 | 6.2 | 7.1 | 8.7 | 9.1 | 10.3 | 10.4 | 11.1 | 11.2 | 12.1 | 12.5 |
| Lear et al. (2014)               | ✓   |     |     | ✓   |     |     |     |     |     |     |     |     | ✓   | ✓   |     |     | ✓   |     | ✓   | ✓   |     |     |     |     |     |      |      |      |      |      |      |
| Lindsay et al. (2009)            |     |     |     |     |     |     |     |     |     |     |     |     |     |     |     | ✓   | ✓   |     |     | ✓   |     |     |     |     |     |      |      |      |      |      |      |
| Maddison et al. (2014)           | ✓   | ✓   |     | ✓   |     |     |     |     |     |     | ✓   |     |     |     |     |     | ✓   |     |     | ✓   |     |     |     |     | ✓   |      |      |      |      |      |      |
| Widmer et al. (2015)             |     |     | ✓   |     |     |     |     |     |     | ✓   | ✓   | ✓   |     |     | ✓   | ✓   | ✓   |     |     | ✓   |     |     | ✓   | ✓   |     | ✓    |      |      |      |      |      |

\*Highlighted cells indicate that the BCTs were used in all the interventions

Objective studies with no difference between experimental and control groups

| Behaviour Change Technique Codes |     |     |     |     |     |     |     |     |     |     |     |     |     |     |     |     |     |     |     |     |     |     |     |     |     |      |      |      |      |      |      |
|----------------------------------|-----|-----|-----|-----|-----|-----|-----|-----|-----|-----|-----|-----|-----|-----|-----|-----|-----|-----|-----|-----|-----|-----|-----|-----|-----|------|------|------|------|------|------|
| Study                            | 1.1 | 1.2 | 1.3 | 1.4 | 1.5 | 1.6 | 1.7 | 1.8 | 2.1 | 2.2 | 2.3 | 2.4 | 2.5 | 2.6 | 2.7 | 3.1 | 3.2 | 3.3 | 4.1 | 5.1 | 6.1 | 6.2 | 7.1 | 8.7 | 9.1 | 10.3 | 10.4 | 11.1 | 11.2 | 12.1 | 12.5 |
| Barnason et al. (2009)           |     |     |     |     |     |     |     |     |     |     |     |     |     |     |     |     |     |     |     |     |     |     |     | ✓   |     |      |      |      |      |      |      |
| Tomita et al. (2009)             |     |     |     |     |     |     |     |     |     |     | ✓   | ✓   |     |     | ✓   | ✓   | ✓   | ✓   | ✓   | ✓   |     |     |     |     | ✓   |      |      |      | ✓    |      |      |

Self-report studies with difference between experimental and control groups

| Behaviour Change Technique Codes |     |     |     |     |     |     |     |     |     |     |     |     |     |     |     |     |     |     |     |     |     |     |     |     |     |      |      |      |      |      |      |
|----------------------------------|-----|-----|-----|-----|-----|-----|-----|-----|-----|-----|-----|-----|-----|-----|-----|-----|-----|-----|-----|-----|-----|-----|-----|-----|-----|------|------|------|------|------|------|
| Study                            | 1.1 | 1.2 | 1.3 | 1.4 | 1.5 | 1.6 | 1.7 | 1.8 | 2.1 | 2.2 | 2.3 | 2.4 | 2.5 | 2.6 | 2.7 | 3.1 | 3.2 | 3.3 | 4.1 | 5.1 | 6.1 | 6.2 | 7.1 | 8.7 | 9.1 | 10.3 | 10.4 | 11.1 | 11.2 | 12.1 | 12.5 |
| Chow et al. 2015                 |     | ✓   |     |     |     |     |     |     |     |     |     |     |     |     |     |     | ✓   |     |     | ✓   |     |     | ✓   |     | ✓   |      |      |      |      |      |      |
| Frederix et al. (2015)           | ✓   |     |     |     |     |     |     |     |     | ✓   |     |     |     |     |     |     | ✓   |     | ✓   | ✓   |     |     |     | ✓   |     |      |      | ✓    |      |      |      |
| Hanssen et al. (2007)            | ✓   |     |     |     |     |     |     |     |     |     |     |     |     |     |     |     |     | ✓   | ✓   | ✓   |     |     |     |     | ✓   |      |      |      |      |      |      |
| Reid et al. (2011)               | ✓   |     |     |     |     |     |     |     |     | ✓   | ✓   |     |     |     |     | ✓   | ✓   |     | ✓   |     |     |     |     |     |     |      |      |      |      |      |      |

Objective studies with a difference between exp. and control groups

| Study                    | Behaviour Change Technique Codes |     |     |     |     |     |     |     |     |     |     |     |     |     |     |     |     |     |     |     |     |     |     |     |     |      |      |      |      |      |      |  |  |
|--------------------------|----------------------------------|-----|-----|-----|-----|-----|-----|-----|-----|-----|-----|-----|-----|-----|-----|-----|-----|-----|-----|-----|-----|-----|-----|-----|-----|------|------|------|------|------|------|--|--|
|                          | 1.1                              | 1.2 | 1.3 | 1.4 | 1.5 | 1.6 | 1.7 | 1.8 | 2.1 | 2.2 | 2.3 | 2.4 | 2.5 | 2.6 | 2.7 | 3.1 | 3.2 | 3.3 | 4.1 | 5.1 | 6.1 | 6.2 | 7.1 | 8.7 | 9.1 | 10.3 | 10.4 | 11.1 | 11.2 | 12.1 | 12.5 |  |  |
| Ammenworth et al. (2015) | ✓                                |     | ✓   |     |     |     |     |     | ✓   | ✓   | ✓   | ✓   | ✓   | ✓   | ✓   | ✓   | ✓   |     |     | ✓   |     |     |     |     |     |      |      |      |      |      |      |  |  |
| Antypas et al. (2014)    | ✓                                |     |     | ✓   |     |     |     |     |     | ✓   |     |     |     |     |     | ✓   |     |     | ✓   | ✓   |     |     | ✓   |     |     |      |      |      |      |      |      |  |  |
| Devi et al. 2014         | ✓                                |     |     |     | ✓   |     |     |     |     | ✓   | ✓   |     |     |     |     |     |     |     |     | ✓   |     |     |     | ✓   |     |      | ✓    |      | ✓    |      |      |  |  |
| Furber et al. (2010)     | ✓                                | ✓   |     |     | ✓   |     |     |     |     | ✓   | ✓   |     |     | ✓   |     | ✓   |     |     |     |     |     |     |     |     |     |      |      |      |      |      |      |  |  |
| Reid et al. (2011)       | ✓                                |     |     |     |     |     |     |     |     | ✓   | ✓   |     |     |     |     | ✓   | ✓   |     | ✓   |     |     |     |     |     |     |      |      |      |      |      |      |  |  |

\*Highlighted cells indicate that the BCTs were used in all the interventions
